# Supplementary material
Source: MDPI journal article supplement (https://www.mdpi.com/2073-4344/13/2/219)

Supplementary Material for

# Influence of Rapid Heat Treatment on the Photocatalytic Activity and Stability of Strontium Titanates against a Broad Range of Pollutants

Mahsa Abedi <sup>1</sup>, Ákos Szamosvölgyi <sup>1</sup>, András Sápi <sup>1</sup>, Ákos Kukovecz <sup>1</sup>, Zoltán Kónya <sup>1</sup>, Tamás Gyulavári <sup>1,\*</sup> and Zsolt Pap <sup>1,2,3,\*</sup>

<sup>1</sup> Department of Applied and Environmental Chemistry, University of Szeged, Rerrich Béla Sqr. 1, 6720 Szeged, Hungary

<sup>2</sup> Nanostructured Materials and Bio-Nano-Interfaces Center, Interdisciplinary Research Institute on Bio-Nano-Sciences, Babes-Bolyai University, Treboniu Laurian Str. 42, 400271 Cluj-Napoca, Romania

<sup>3</sup> Institute of Research-Development-Innovation in Applied Natural Sciences, Babes-Bolyai University, Fântânele Str. 30, 400294 Cluj-Napoca, Romania

\* Correspondence: gyulavarit@chem.u-szeged.hu (T.G.); pzsolt@chem.u-szeged.hu (Z.P.); Tel.: +36-62-544-626 (T.G.); +36-62-543-795 (Z.P.)

**Figure S1**

TG curve of the xerogel obtained by the modified Pechini method.

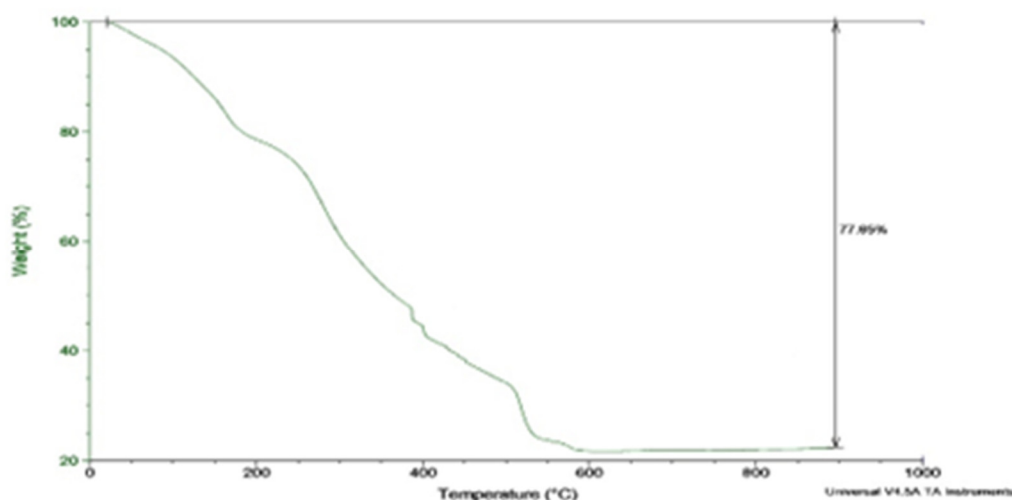

**Figure S2**

XRD patterns of STO\_RHSE\_600 (a), STO\_RHSE\_700 (b), STO\_RHSE\_800 (c), STO\_RHSE\_900 (d), and STO\_RHSE\_1000 (e) before and after their exposure to the pollutants with various functional groups.

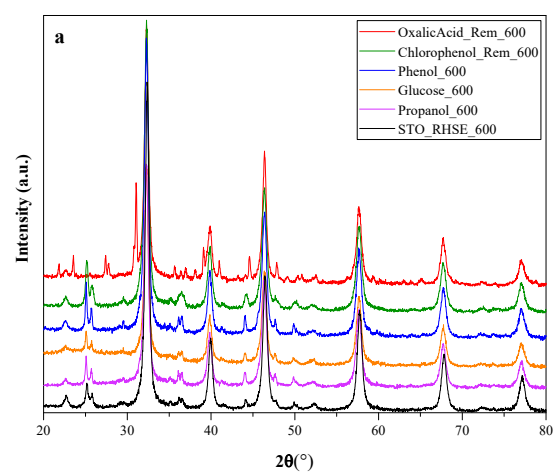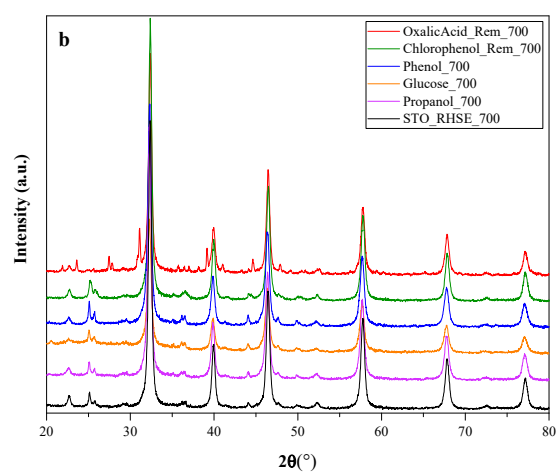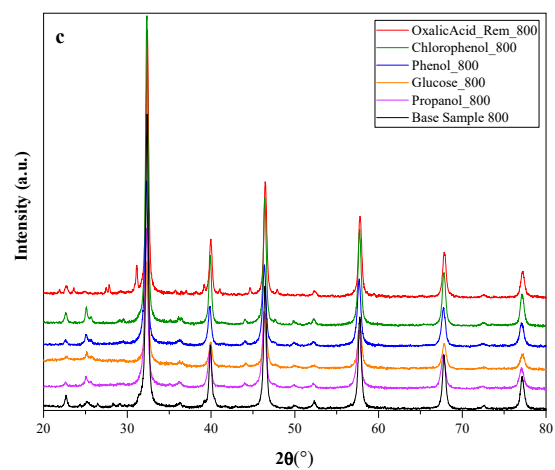

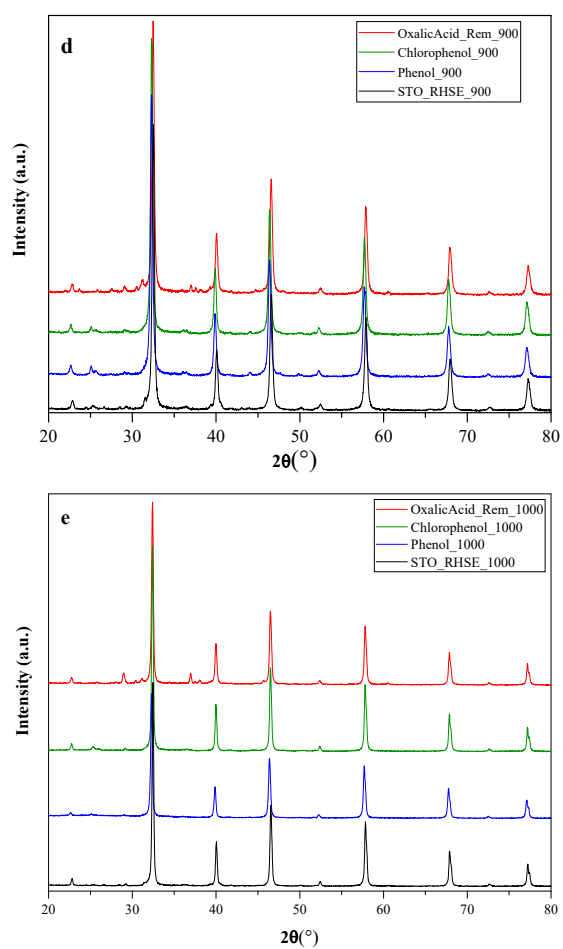

Figure S3

SEM micrographs of the catalysts after exposure to compounds with various functional groups.

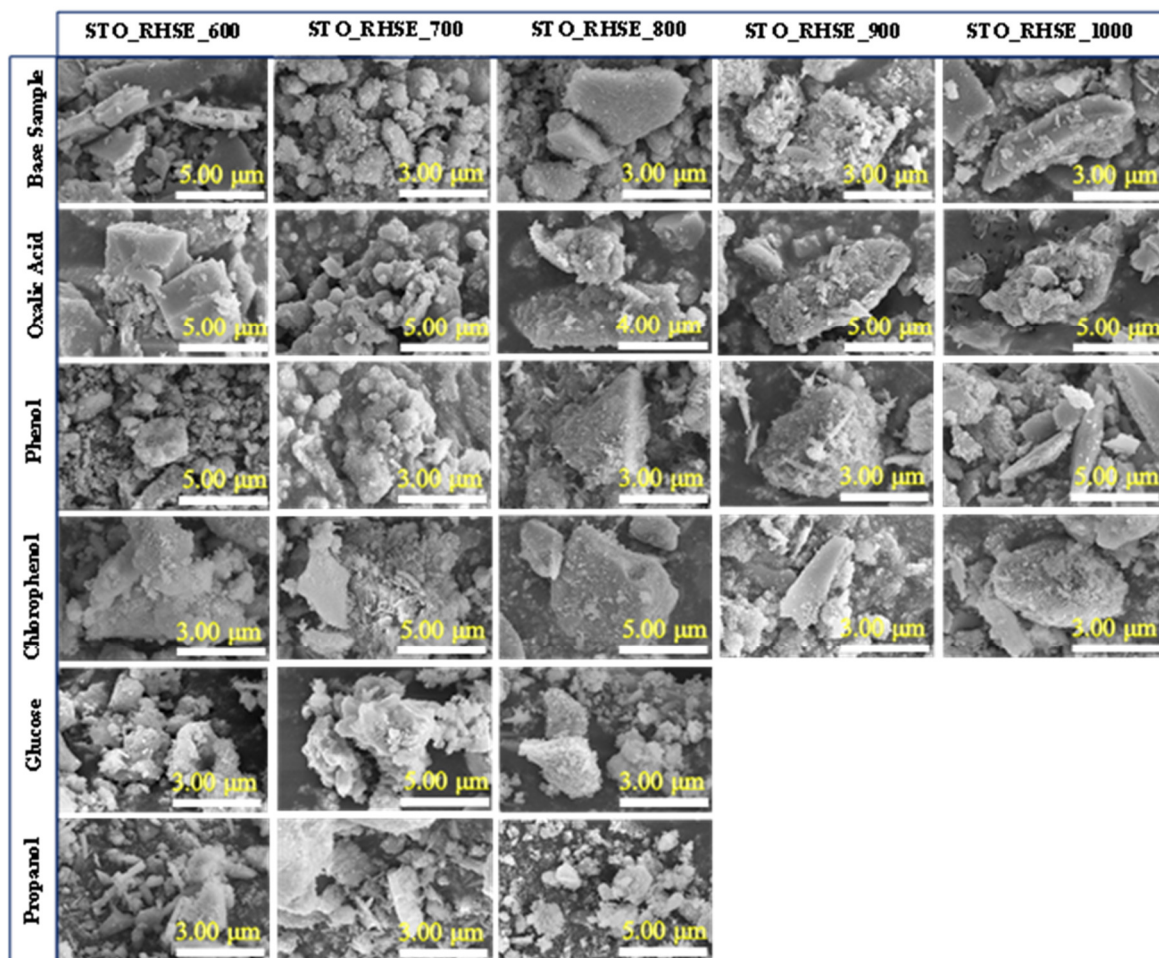

Figure S4

IR spectra of catalysts after their exposure to phenol (a), chlorophenol (b), oxalic acid (c), glucose (d), and propanol (e).

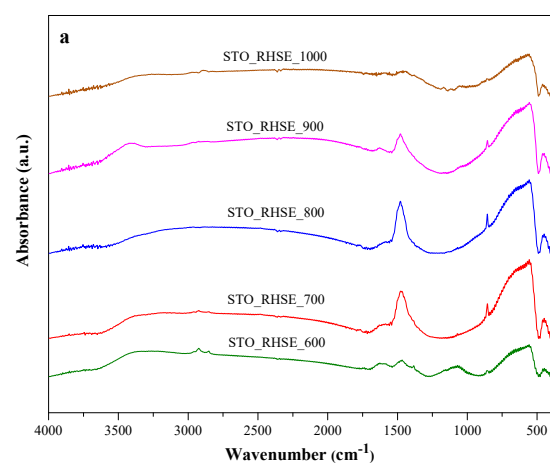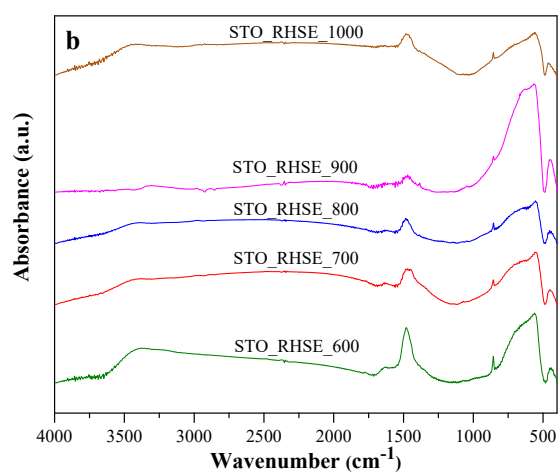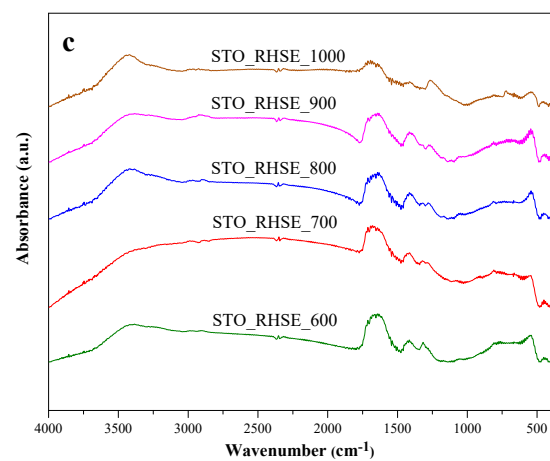

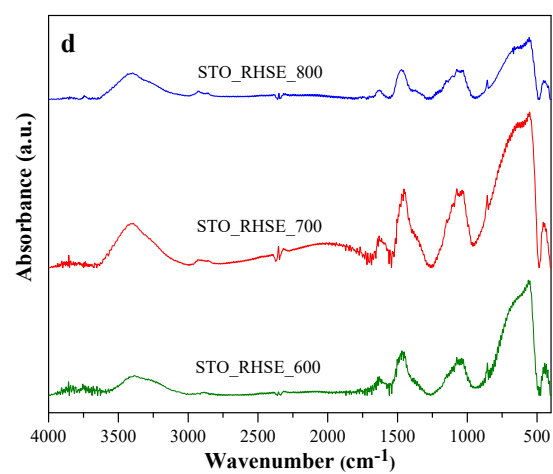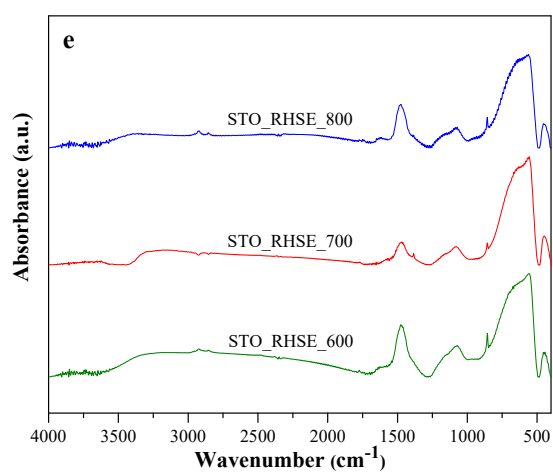

Supplement: s1 [file s1]
